# Supplementary material for: Porous Microspheres Comprising CoSe2 Nanorods Coated with N-Doped Graphitic C and Polydopamine-Derived C as Anodes for Long-Lived Na-Ion Batteries
Source: PubMed Central journal article supplement (PMC9050979; doi:10.1007/s40820-022-00855-z), 2022-04-28
Supplement: 40820_2022_855_MOESM1_ESM.pdf [file 40820_2022_855_MOESM1_ESM.pdf]

Supporting Information for

## Porous Microspheres Comprising CoSe<sub>2</sub> Nanorods Coated with N-Doped Graphitic C and Polydopamine-Derived C as Anodes for Long-Lived Na-Ion Batteries

Jae Seob Lee<sup>1</sup>, Rakesh Saroha<sup>1</sup>, and Jung Sang Cho<sup>1, \*</sup>

<sup>1</sup>Department of Engineering Chemistry, Chungbuk National University, Chungbuk 361-763, Republic of Korea

\*Corresponding author. E-mail: [jscho@cbnu.ac.kr](mailto:jscho@cbnu.ac.kr) (Jung Sang Cho)

### Supplementary Figures and Tables

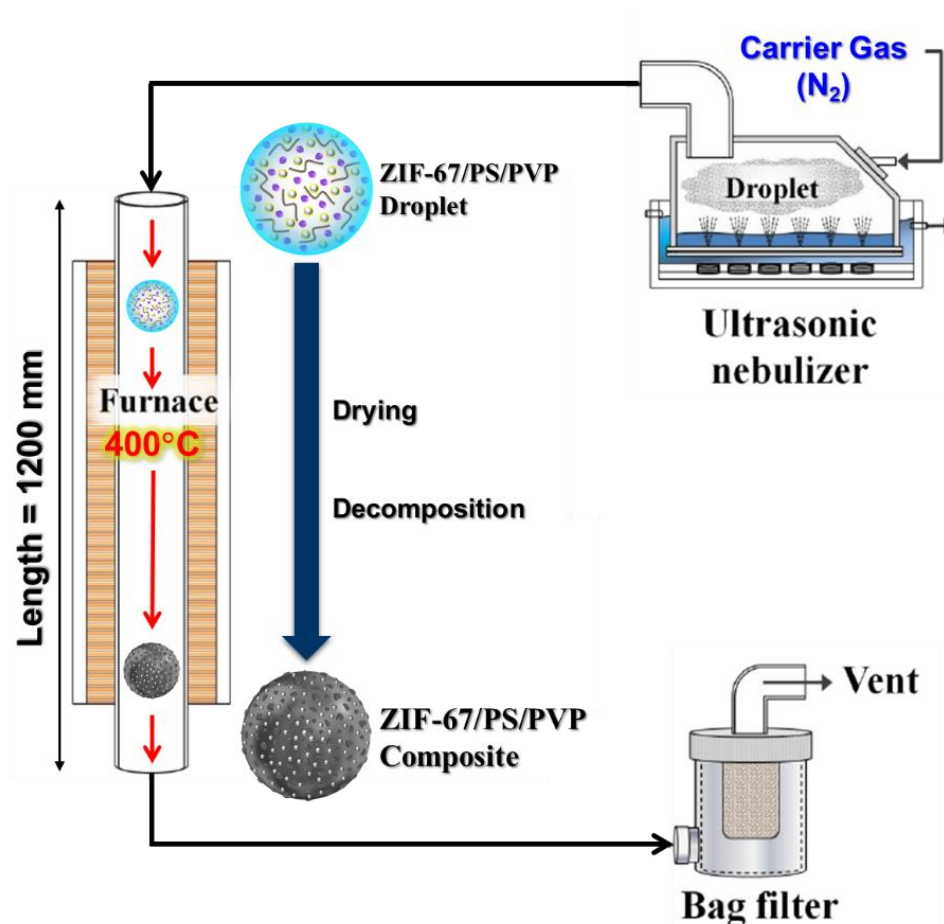

**Scheme S1** Schematic diagram of the spray pyrolysis system for the preparation of ZIF-67/PS/PVP composited precursor microspheres

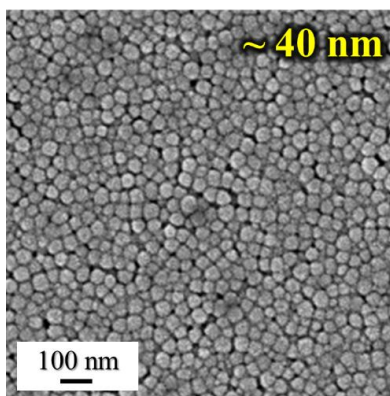

**Fig. S1** FE-SEM image of PS nanobeads used to prepare spray solution

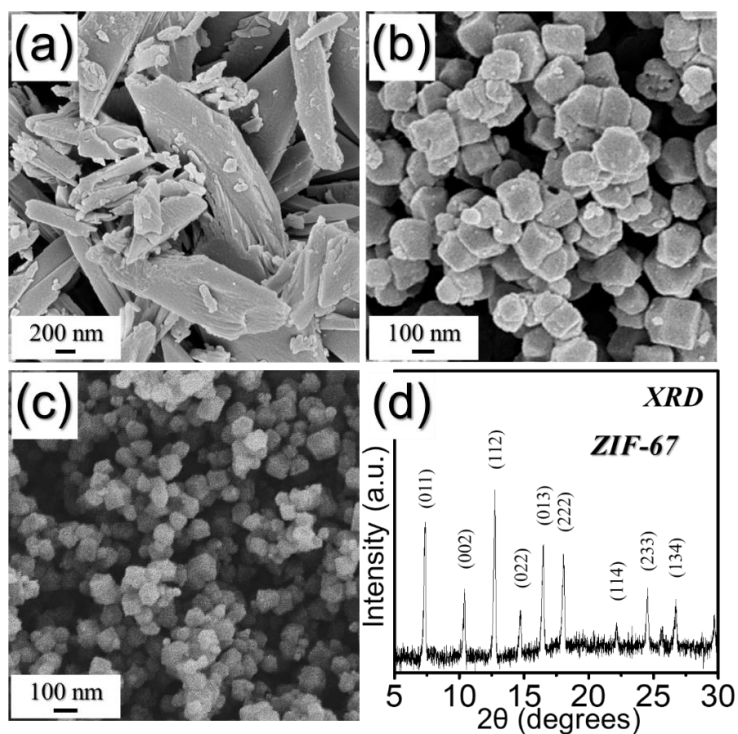

**Fig. S2** Physical characteristics of the prepared ZIF-67 polyhedrons obtained from the solution **a** without TEA, with **b** 3 mL TEA, **c** 6 mL TEA, and **d** XRD pattern of ZIF-67 polyhedrons with 6 mL TEA

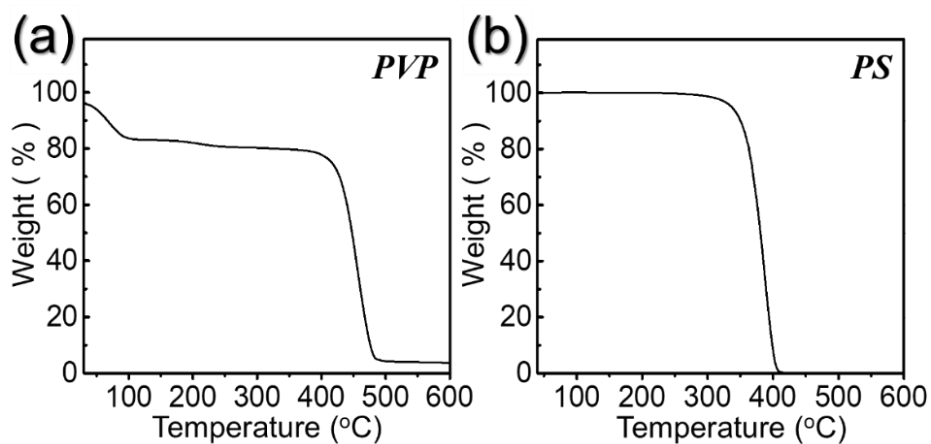

**Fig. S3** TG curves of **a** polyvinylpyrrolidone (PVP), and **b** polystyrene (PS)

The pores formed by the decomposition of PS nanobeads has both roles on the formation of CoSe<sub>2</sub> nanorods during the selenization process. Firstly, the pores facilitate the penetration of H<sub>2</sub>Se gas into the structure, promoting uniform selenization, both inside and on the external surface. Secondly, the pores also guarantee the enough space between nanorods that prohibits the agglomeration of CoSe<sub>2</sub> nanorods and allow them to grow. To confirm this reasoning, the ZIF-67/PVP microspheres without PS beads is prepared and analyzed the morphological changes after selenization at different temperatures, as shown Fig. S4. As observed, the CoSe<sub>2</sub> rods start to form at external surface. As the reaction proceeds, they sintered into non-rod like particles due to the absence of pores or enough space between nanorods to prevent agglomeration.

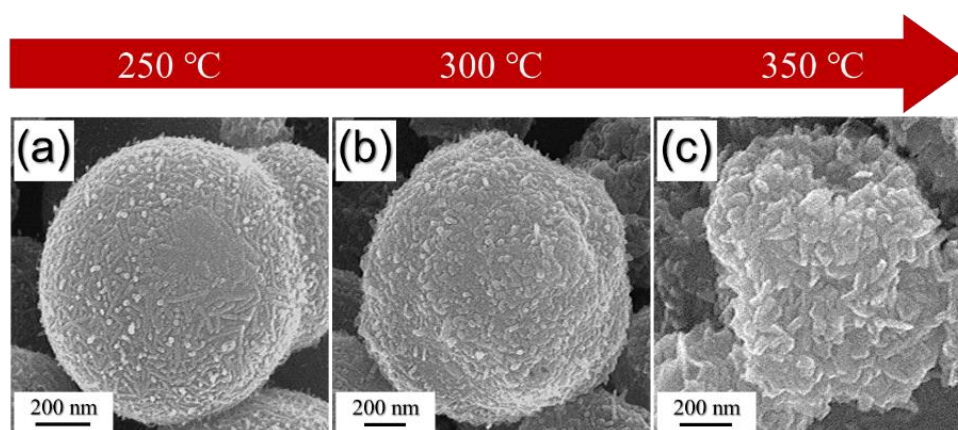

**Fig. S4** FE-SEM images of ZIF-67/PVP composite microspheres without PS nanobeads after selenization at different temperatures: **a** 250 °C, **b** 300 °C, and **c** 350 °C

The presence of PS nanobeads in the composite microspheres and their subsequent decomposition guarantees in highly porous 3D microspheres with efficient conversion of central Co atom in ZIF-67 to 1D CoSe<sub>2</sub> NR during the selenization process due to the effective penetration of H<sub>2</sub>Se gas and guaranteed the enough space between nanorods to prevent agglomeration. In this regard, it is highly indispensable to elucidate the effect of PS nanobeads on the formation of porous microspheres covered with CoSe<sub>2</sub> nanorods. The crystal structure and morphological features of the as-sprayed ZIF-67/PVP (i.e., without PS nanobeads suspension) composite microspheres prepared under identical conditions are shown in Fig. S5 along with the detailed synthesis mechanism (Fig. S5a). The FE-SEM image of the ZIF-67/PVP composite microsphere (Fig. S5b) also displayed spherical morphology with a mean diameter of about 1.0 μm. The lower dimension of the microsphere seems obvious due to the absence of PS nanobeads. The as-sprayed composite microspheres were further subjected to selenization process, and the morphology of resulted microspheres is presented in Fig. S5c. The FE-SEM image clearly indicates highly aggregated non-rod like particles due to insufficient space between nanorods, which covered the microsphere (mean diameter ~0.8 μm) surface suggesting incomplete directional recrystallization process in the non-porous structure. Besides, the XRD pattern in Fig. S5d indicates sharp diffraction peaks that could be assigned to o-CoSe<sub>2</sub> crystal structure.

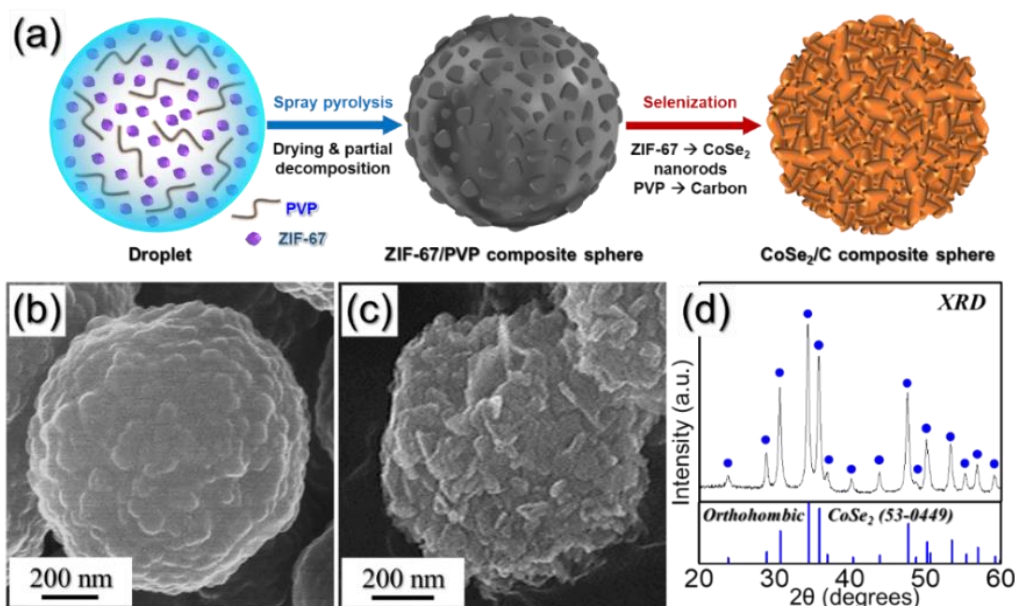

**Fig. S5** **a** Schematic representation of formation mechanism of the  $\text{CoSe}_2/\text{C}$  composite microspheres, **b** FE-SEM images of the ZIF-67/PVP composite microspheres prepared without PS nanobeads, **c** FE-SEM images of the  $\text{CoSe}_2/\text{C}$  composite microspheres obtained after selenization at  $350^\circ\text{C}$ , and **d** XRD pattern of the  $\text{CoSe}_2/\text{C}$  composite microspheres

**Table S1** Inductively coupled plasma-optical emission spectrometer (ICP-OES) results for P- $\text{CoSe}_2@\text{NGC}$  NR microspheres

| Sample                           | Cobalt (wt%) | Selenium (wt%) |
|----------------------------------|--------------|----------------|
| P- $\text{CoSe}_2@\text{NGC}$ NR | 20.4         | 57.6           |

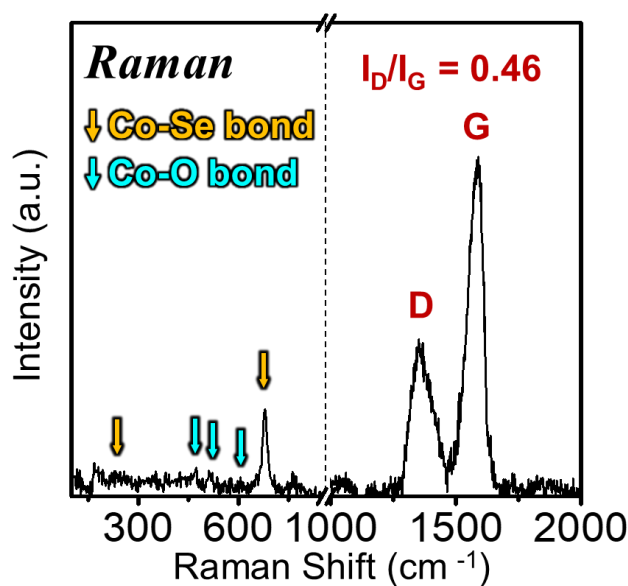

**Fig. S6** Raman spectrum of the P- $\text{CoSe}_2@\text{NGC}$  NR microspheres

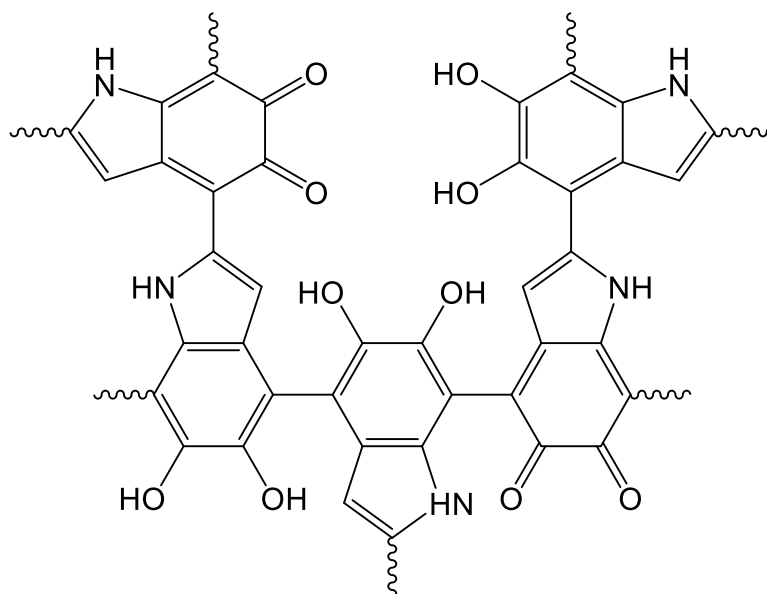

**Fig. S7** The molecular structure of polydopamine (PDA)

**Table S2** Elemental analysis (EA) of the P-CoSe<sub>2</sub>@NGC NR microspheres and P-CoSe<sub>2</sub>@PDA-C NR microspheres

| Sample                        | Carbon (wt%) | Nitrogen (wt%) |
|-------------------------------|--------------|----------------|
| P-CoSe <sub>2</sub> @NGC NR   | 16           | 2              |
| P-CoSe <sub>2</sub> @PDA-C NR | 33           | 4              |

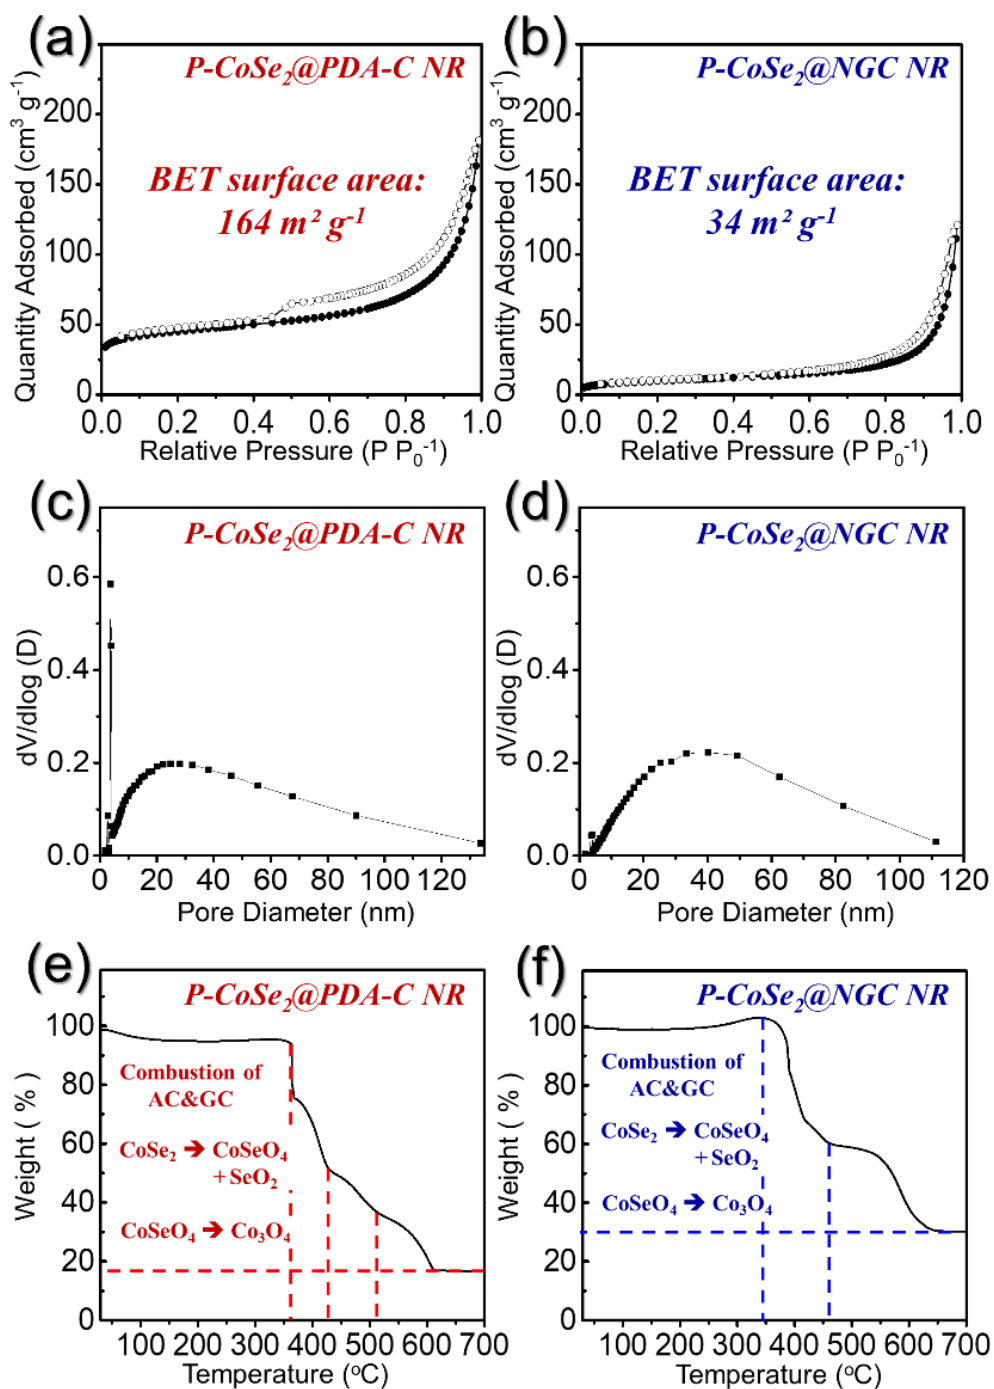

**Fig. S8** **a, b** N<sub>2</sub> adsorption-desorption isotherms, **c, d** BJH desorption pore-size distributions and **e, f** TG curves of samples: **a, c, e** P-CoSe<sub>2</sub>@PDA-C NR and **b, d, f** P-CoSe<sub>2</sub>@NGC NR microspheres

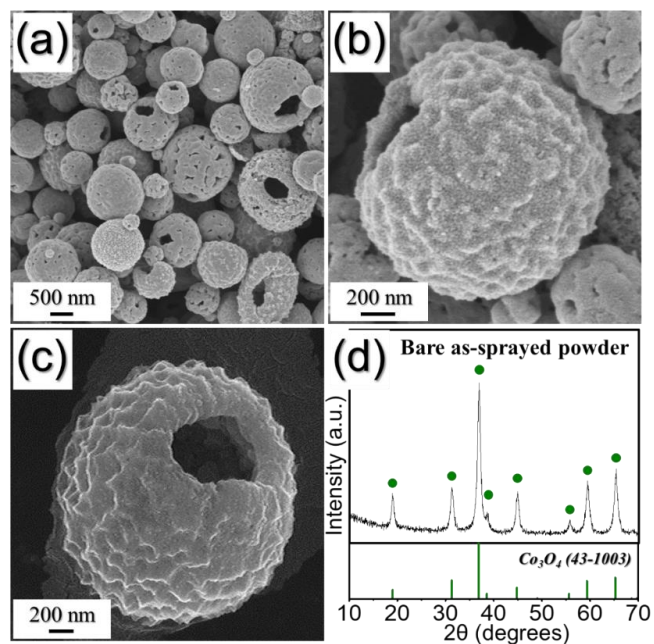

**Fig. S9** a-c FE-SEM images, and d XRD pattern of the bare  $\text{Co}_3\text{O}_4$  hollow microspheres obtained after spray pyrolysis in an air atmosphere at  $400\text{ }^\circ\text{C}$

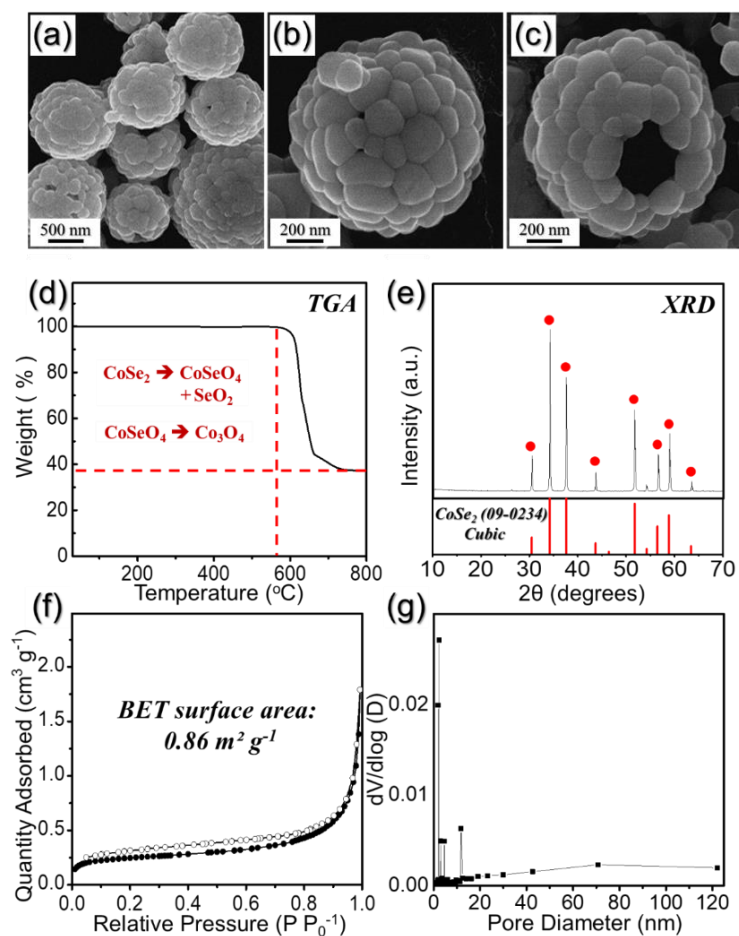

**Fig. S10** a-c FE-SEM images, d TG curve, e XRD pattern, f  $\text{N}_2$  adsorption-desorption isotherms, and g BJH desorption pore-size distributions of the bare  $\text{CoSe}_2$  hollow microspheres

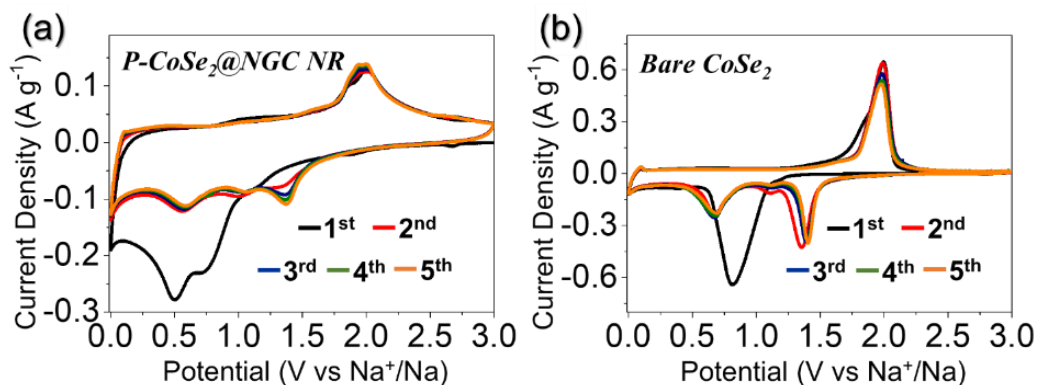

**Fig. S11** Cyclic voltammogram (CV) curves of **a** the P-CoSe<sub>2</sub>@NGC NR microspheres and **b** bare CoSe<sub>2</sub> hollow microspheres

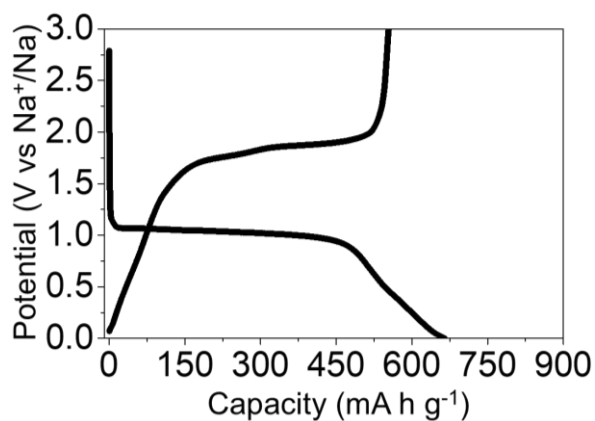

**Fig. S12** Initial charge/discharge curves of the bare CoSe<sub>2</sub> hollow microspheres at a current density of 0.1 A g<sup>-1</sup>

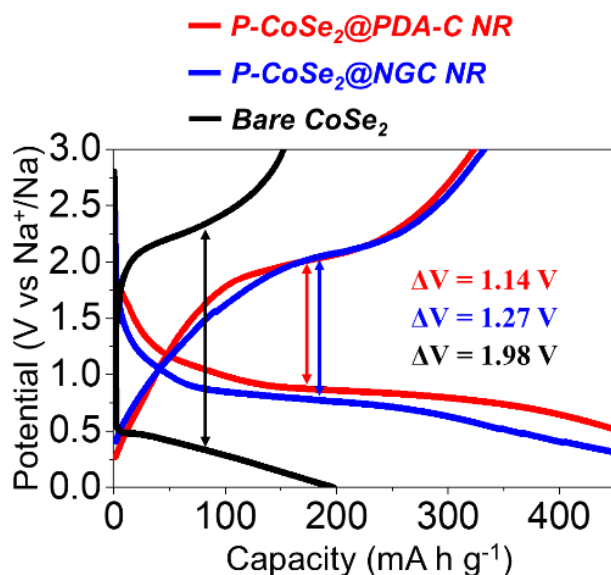

**Fig. S13** Initial discharge/charge curves at a current density of 0.5 A g<sup>-1</sup>



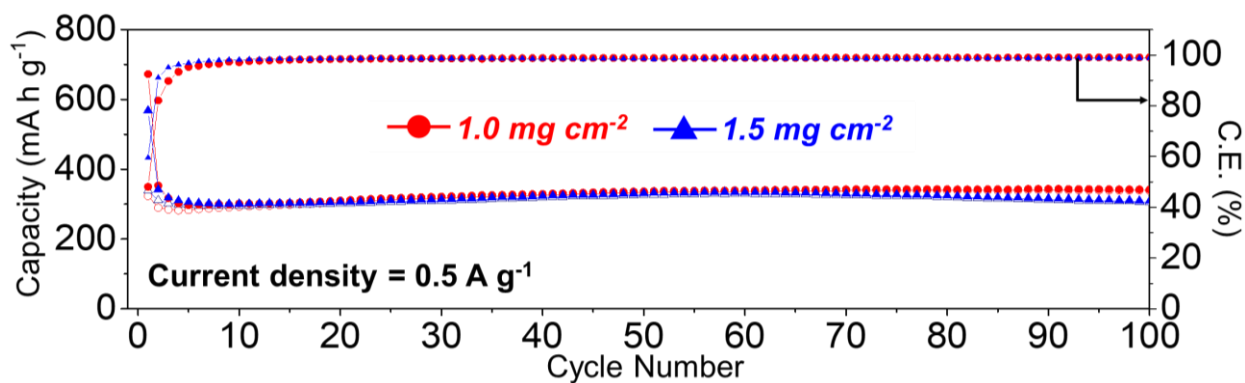

**Fig. S14** Cycling performance of the P-CoSe<sub>2</sub>@PDA-C NR microspheres with different mass loading of active material at a current density of 0.5 A g<sup>-1</sup>

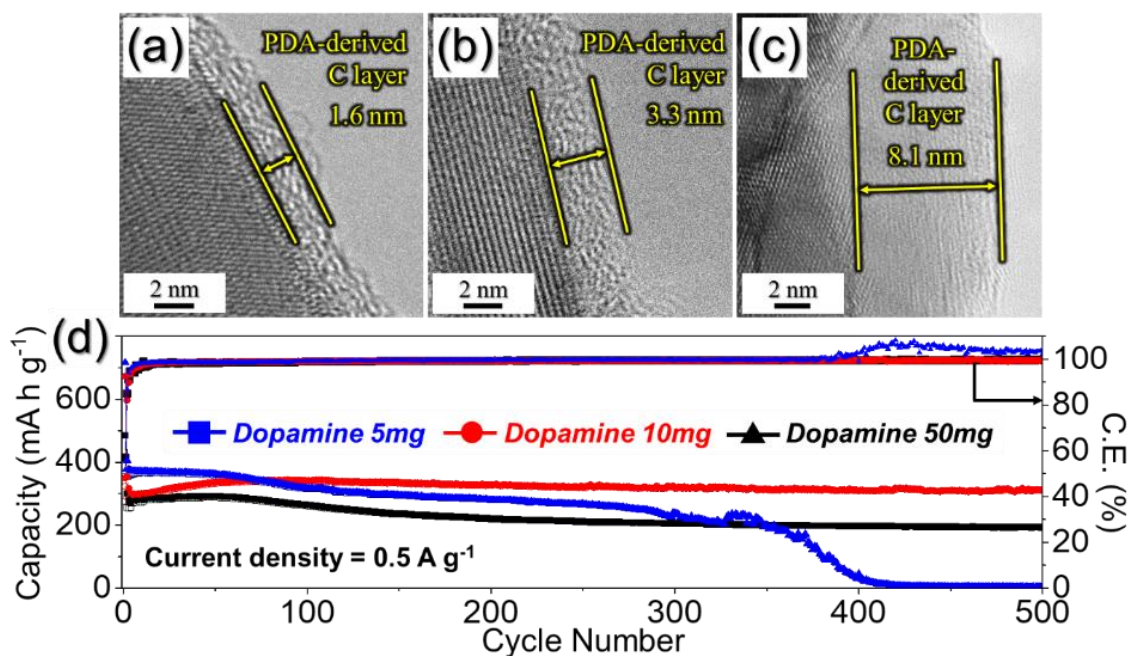

**Fig. S15 a-c** HR-TEM images and **d** cycling performance of P-CoSe<sub>2</sub>@PDA-C NR microspheres synthesized with different amounts of dopamine hydrochloride at a current density of 0.5 A g<sup>-1</sup>: **a** 5 mg, **b** 10mg, **c** 50mg

**Table S3** Electrochemical performance comparison of P-CoSe<sub>2</sub>@PDA-C NR microspheres prepared in this study with other cobalt selenides as anodes reported previously

| Materials                                                                  | Current Density [A g <sup>-1</sup> ] | Initial C <sub>dis</sub> /C <sub>cha</sub> [mA h g <sup>-1</sup> ]/ICE [%] | Cycle No./Discharge Capacity [mA h g <sup>-1</sup> ] | Capacity Retention [%] | Average Discharge Potential [V] | Mass Loading [mg cm <sup>-2</sup> ] | Refs.        |
|----------------------------------------------------------------------------|--------------------------------------|----------------------------------------------------------------------------|------------------------------------------------------|------------------------|---------------------------------|-------------------------------------|--------------|
| P-CoSe <sub>2</sub> @PDA-C NR                                              | 0.5<br>2.0                           | 640/308/48<br>515/287/56                                                   | 1,000/291<br>5,000/142                               | 92<br>75*              | 0.9                             | 1.0                                 | In this work |
| CoSe <sub>2</sub> @N-doped C@TiO <sub>2</sub> nanoparticle                 | 0.2                                  | 645/488/76                                                                 | 200/374                                              | 78                     | -                               | 0.88                                | [S1]         |
| CoSe <sub>x</sub> -rGO composite powder                                    | 0.3                                  | 656/459/70                                                                 | 50/420                                               | 80                     | -                               | 1.2                                 | [S2]         |
| CoSe <sub>2</sub> @N-doped porous graphitic carbon/CNT composite           | 0.2                                  | 601/454/76                                                                 | 100/424                                              | -                      | -                               | 1.2                                 | [S3]         |
| CoSe <sub>2</sub> @N-doped carbon ramework/CNT composite                   | 1.0                                  | 713/531/74                                                                 | 100/499                                              | 92                     | -                               | 2.0                                 | [S4]         |
| CoSe <sub>2</sub> @N-doped carbon nanorod/CNT porous composite microsphere | 0.2                                  | 926/609/66                                                                 | 100/555                                              | 85                     | -                               | 1.3                                 | [S5]         |
| Bone-like CoSe <sub>2</sub> nanothorn coated on porous carbon cloth        | 0.1                                  | 1260/553/44                                                                | 180/361                                              | 74                     | -                               | 0.5                                 | [S6]         |
| Cu-doped CoSe <sub>2</sub> microbox                                        | 1.0                                  | -                                                                          | 500/365                                              | 94                     | -                               | -                                   | [S7]         |
| Necklace like-CNT/CoSe <sub>2</sub> @ N-doped carbon composite particle    | 0.2                                  | 686/462/67                                                                 | 120/404                                              | 80                     | -                               | 1.2                                 | [S8]         |
| CoSe <sub>2</sub> @N-doped carbon matrix                                   | 1.0                                  | -                                                                          | 500/282                                              | -                      | -                               | -                                   | [S9]         |

“\* : Measured after stabilization (150 cycles)”

**Note:** It should be noted that all the references in the comparison table are based on carbonate-based electrolyte system.

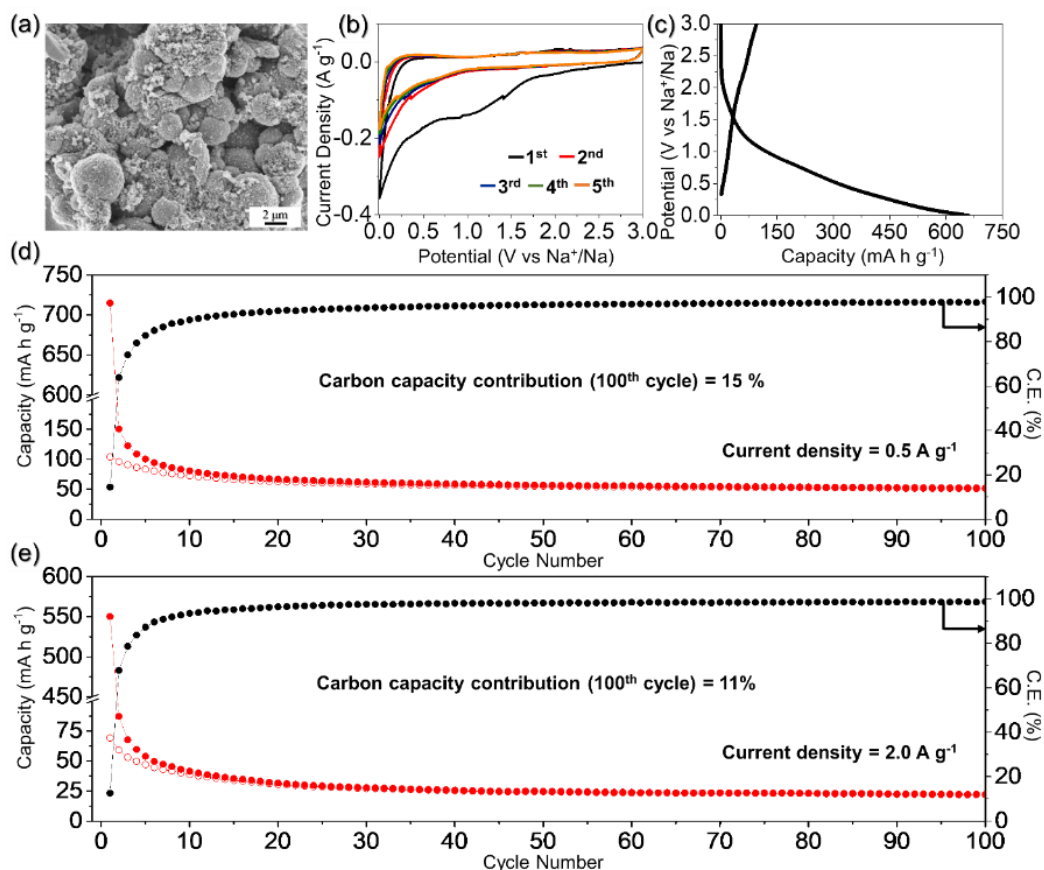

**Fig. S16** Physical and electrochemical characterizations of PDA derived conductive C/NGC microspheres obtained from etched P-CoSe<sub>2</sub>@PDA-C NR microspheres using hydrochloric acid: **a** FE-SEM image, **b** cyclic voltammetry curves at 0.1 mV s<sup>-1</sup>, **c** initial discharge/charge profile, **d** cycling performance at 0.5 A g<sup>-1</sup>, and **e** cycling performance at 2.0 A g<sup>-1</sup>

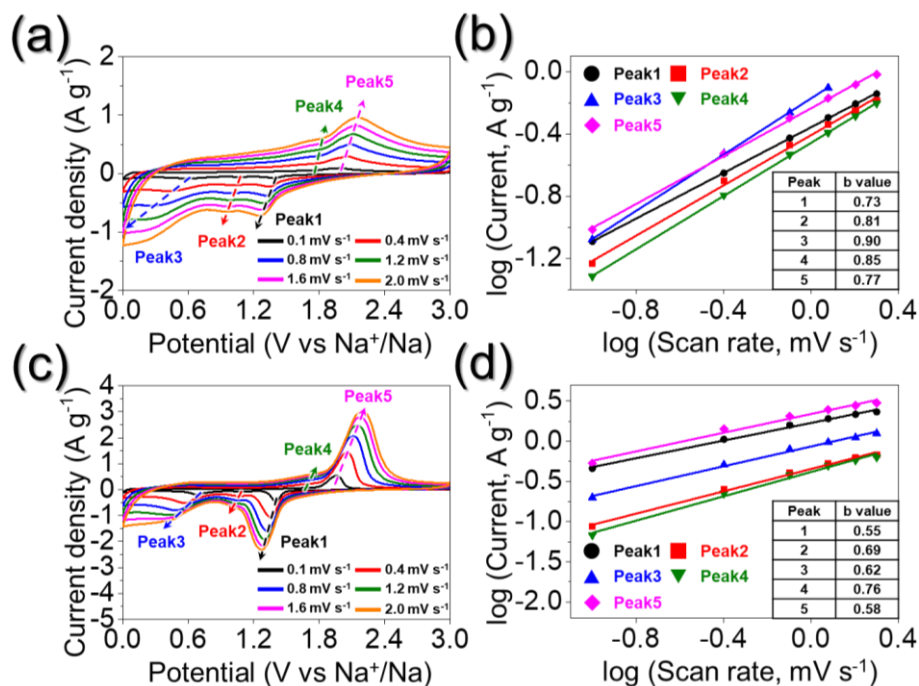

**Fig. S17** Electrochemical reaction dynamics analysis of **a** and **b** the P-CoSe<sub>2</sub>@NGC NR microspheres and **c** and **d** bare CoSe<sub>2</sub> hollow microspheres: **a** and **c** CV curves obtained at various scan rates, **b** and **d** current response (*i*) vs. scan rate (*n*) at each redox peak

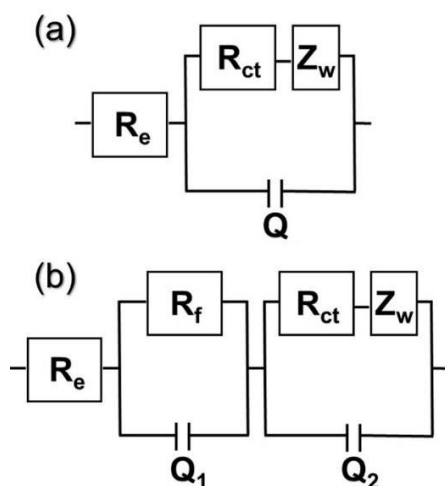

**Fig. S18** Equivalent circuit model used for AC impedance fitting: **a** before cycling, and **b** after cycling,  $R_{ct}$  = charge-transfer resistance,  $R_e$  = electrolyte resistance,  $R_f$  = SEI layer resistance,  $Q_1$  = dielectric relaxation capacitance,  $Q_2$  = associated double layer capacitance

**Table S4** EIS fitted parameters for each Na-ion cells utilizing three samples as anode materials before cycle, after 5<sup>th</sup>, and after 300<sup>th</sup> cycle at 0.5 A g<sup>-1</sup>

| Sample                            | Fresh cell            |                          |      | After 5 <sup>th</sup> cycle |                       |       |                          |       | After 300 <sup>th</sup> cycle |                       |       |                          |       |
|-----------------------------------|-----------------------|--------------------------|------|-----------------------------|-----------------------|-------|--------------------------|-------|-------------------------------|-----------------------|-------|--------------------------|-------|
|                                   | $R_e$<br>( $\Omega$ ) | $R_{ct}$<br>( $\Omega$ ) | Q    | $R_e$<br>( $\Omega$ )       | $R_f$<br>( $\Omega$ ) | $Q_1$ | $R_{ct}$<br>( $\Omega$ ) | $Q_2$ | $R_e$<br>( $\Omega$ )         | $R_f$<br>( $\Omega$ ) | $Q_1$ | $R_{ct}$<br>( $\Omega$ ) | $Q_2$ |
| P-CoSe <sub>2</sub> @P<br>DA-C NR | 30                    | 362                      | 0.71 | 27                          | 11                    | 0.73  | 81                       | 0.66  | 25                            | 29                    | 0.62  | 76                       | 0.69  |
| P-CoSe <sub>2</sub> @N<br>GC NR   | 30                    | 755                      | 0.58 | 28                          | 16                    | 0.54  | 88                       | 0.61  | 26                            | 51                    | 0.64  | 152                      | 0.73  |
| Bare<br>CoSe <sub>2</sub>         | 35                    | 1463                     | 0.66 | 33                          | 18                    | 0.61  | 83                       | 0.63  | 28                            | 73                    | 0.68  | 168                      | 0.79  |

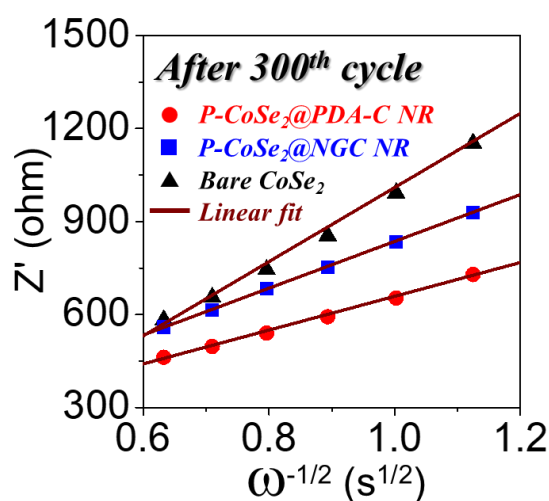

**Fig. S19** Relationship between the real part of the impedance ( $Z'_{re}$ ) and  $\omega^{-1/2}$  of the P-CoSe<sub>2</sub>@PDA-C NR, P-CoSe<sub>2</sub>@NGC NR, and bare CoSe<sub>2</sub> hollow microspheres obtained after 300<sup>th</sup> cycles at 0.5 A g<sup>-1</sup>

The XPS analysis for the cycled electrode (P-CoSe<sub>2</sub>@PDA-C NR microspheres after 300 cycles) is performed to confirm the presence of SEI layer, as shown below. As observed, the XPS survey spectrum shown in Fig. S20a not only exhibits Co 2p, Se 3d, C 1s, and N 1s signals but also display photoelectron signal attributed to Na 1s at a binding energy of 1071.6 eV [S10, S11]. The presence of high intense Na 1s peak strongly indicates the existence of Na<sub>2</sub>CO<sub>3</sub> that formed due to electrolyte decomposition and subsequent formation of solid electrolyte interface, as reported previously (Fig. S20b) [S10, S11]. Likewise, the deconvoluted C 1s spectrum (Fig. S20c) also indicates the presence of various bonds that corresponds to different species usually present in SEI [S12-S14]. Based on the above observations, the authors believed that the SEI was formed in the cycled electrodes.

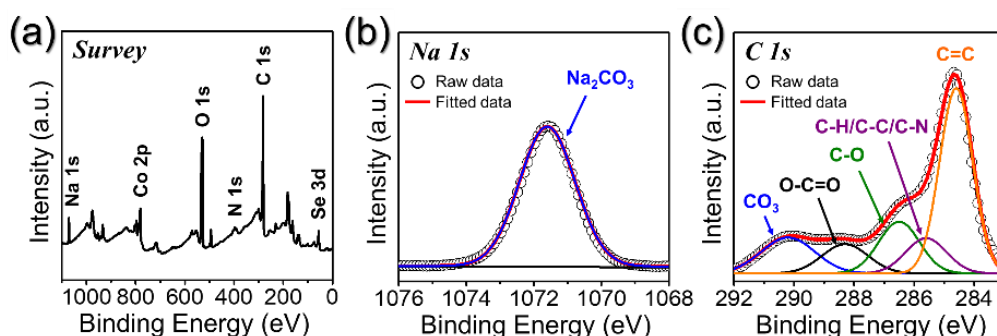

**Fig. S20** XPS survey spectrum, and core-level XPS spectra: **a** XPS survey spectrum, **b** Na 1s, and **c** C 1s of the P-CoSe<sub>2</sub>@PDA-C NR microspheres obtained after 300<sup>th</sup> cycles at 0.5 A g<sup>-1</sup>

## Supplementary References

- [S1] B. Zhao, Q. Liu, G. Wei, J. Wang, X.Y. Yu et al., Synthesis of CoSe<sub>2</sub> nanoparticles embedded in N-doped carbon with conformal TiO<sub>2</sub> shell for sodium-ion batteries. *Chem. Eng. J.* **378**(1), 122206 (2019). <https://doi.org/10.1016/j.cej.2019.122206>
- [S2] G.D. Park, Y.C. Kang, One-pot synthesis of CoSe<sub>x</sub>-rGO composite powders by spray pyrolysis and their application as anode material for sodium-ion batteries. *Chem. Eur. J.* **22**(12), 4140-4146 (2016). <https://doi.org/10.1002/chem.201504398>
- [S3] S.K. Park, J.K. Kim, Y.C. Kang, Excellent sodium-ion storage performances of CoSe<sub>2</sub> nanoparticles embedded within N-doped porous graphitic carbon nanocube/carbon nanotube composite. *Chem. Eng. J.* **328**(1), 546-555 (2017). <https://doi.org/10.1016/j.cej.2017.07.079>
- [S4] J. Yang, H. Gao, S. Men, Z. Shi, Z. Lin et al., CoSe<sub>2</sub> nanoparticles encapsulated by N-doped carbon framework intertwined with carbon nanotubes: high-performance dual-role anode materials for both Li- and Na-ion batteries. *Adv. Sci.* **5**(12), 1800763 (2018). <https://doi.org/10.1002/advs.201800763>
- [S5] S.K. Park, Y.C. Kang, MOF-templated N-doped carbon-coated CoSe<sub>2</sub> nanorods supported on porous CNT microspheres with excellent sodium-ion storage and electrocatalytic properties. *ACS Appl. Mater. Interfaces* **10**(20), 17203-17213 (2018). <https://doi.org/10.1021/acsami.8b03607>
- [S6] H. Guo, G. Liu, M. Wang, Y. Zhang, W. Li et al., In-situ fabrication of bone-like CoSe<sub>2</sub> nano-thorn loaded on porous carbon cloth as a flexible electrode for Na-ion storage. *Chem. Asian J.* **15**(9), 1493-1499 (2020). <https://doi.org/10.1002/asia.202000189>

- [S7] Y. Fang, X.Y. Yu, X.W. Lou, Formation of hierarchical Cu-doped CoSe<sub>2</sub> microboxes via sequential ion exchange for high-performance sodium-ion batteries. *Adv. Mater.* **30**(21), 1706668 (2018). <https://doi.org/10.1002/adma.201706668>
- [S8] S.H. Yang, S.K. Park, Y.C. Kang, Mesoporous CoSe<sub>2</sub> nanoclusters threaded with nitrogen-doped carbon nanotubes for high-performance sodium-ion battery anodes. *Chem. Eng. J.* **370**(1), 1008-1018 (2019). <https://doi.org/10.1016/j.cej.2019.03.263>
- [S9] F. Kong, J. Wang, J. Chen, S. Tao, B. Qian et al., MOF-derived ultrasmall CoSe<sub>2</sub> nanoparticles encapsulated by an N-doped carbon matrix and their superior lithium/sodium storage properties. *Chem. Commun.* **56**(64), 9218-9221 (2020). <https://doi.org/10.1039/d0cc03113e>
- [S10] M.H. Lee, S.J. Kim, D. Chang, J. Kim, S. Moon et al., Toward a low-cost high-voltage sodium aqueous rechargeable battery. *Mater. Today* **29**, 26-36 (2019). <https://doi.org/10.1016/j.mattod.2019.02.004>
- [S11] D.A. Cristaldi, C.G. Fortuna, A. Gulino, A photoelectron spectroscopy study of lava stones. *Anal. Methods* **5**, 3458-3462 (2013). <https://doi.org/10.1039/C3AY40136G>
- [S12] J. Fondard, E. Irisarri, C. Courrèges, M.R. Palacin, A. Ponrouch et al., SEI composition on hard carbon in Na-ion batteries after long cycling: influence of salts (NaPF<sub>6</sub>, NaTFSI) and additives (FEC, DMCF). *J. Electrochem. Soc.* **167**, 070526 (2020). <https://doi.org/10.1149/1945-7111/ab75fd>
- [S13] A. Ponrouch, D. Monti, A. Boschini, B. Steen, P. Johansson et al., Non-aqueous electrolytes for sodium-ion batteries. *J. Mater. Chem. A* **3**, 22-42 (2015). <https://doi.org/10.1039/C4TA04428B>
- [S14] A. Darwiche, L. Bodenes, L. Madec, L. Monconduit, H. Martinez, Impact of the salts and solvents on the SEI formation in Sb/Na batteries: an XPS analysis. *Electrochim. Acta* **207**, 284-292 (2016). <https://doi.org/10.1016/j.electacta.2016.03.089>
